# Supplementary material for: The Evolution of the Plateau, an Optical Coherence Tomography Signature Seen in Geographic Atrophy
Source: PubMed Central journal article supplement — Invest Ophthalmol Vis Sci. 2017 Apr;58(4):2349–58. doi: 10.1167/iovs.16-21237 (PMC5413303; doi:10.1167/iovs.16-21237), 2017-04
Supplement: iovs-58-04-09_s02.pdf [file iovs-58-04-09_s02.pdf]

*Supplemental video: Origin and evolution of a plateau, as revealed by near-infrared reflectance (NIR) (left) and optical coherence tomography (OCT) (right) images. NIR images show progressive geographic atrophy (GA). OCT imaging shows two drusenoid PEDs that progressed into plateaus. Progressive loss of the outer nuclear layer has caused the outer plexiform layer (OPL) to approach the surface of the PED, then become downwardly deflected. OPL is seen to move progressively towards the edge of the plateau following the advancing border of GA. Formation of the plateau was characterized by the loss of the overlying RPE causing marked thinning of the hyperreflective RPE-basal lamina complex.*
